# Supplementary material
Source: Elsevier journal article supplement (https://www.sciencedirect.com/science/article/pii/S2341287921001095)
Supplement: mmc1 [file S2341287921001095:mmc1.pdf]

## HOJA INFORMATIVA A PADRES Y CONSENTIMIENTO INFORMADO

(LEER ATENTAMENTE)

Esta encuesta tiene como finalidad realizar un estudio sobre la frecuencia de enuresis nocturna (orinarse en la cama) y la adquisición del control de esfínteres (orinar y defecar) en los niños asturianos de edad escolar.

Ha sido diseñada por un grupo de pediatras gracias a la colaboración de la **Oficina de Investigaciones Biosanitarias del Principado de Asturias**.

La respuesta a esta encuesta es completamente voluntaria y anónima en todos sus contenidos. El manejo de la información obtenida se atenderá a las normas legales de confidencialidad y discreción.

Todas la cuestiones planteadas pueden ser respondidas entre 3 y 5 minutos.

La encuesta consta de dos partes: una primera dirigida exclusivamente a los padres y una parte final con unas preguntas que usted deberá realizar directamente a su hijo.

Elija para cada pregunta la respuesta que le parezca correcta y márquela con bolígrafo haciendo una cruz: ☒

Si su hijo se orina en la cama deberá contestar las preguntas de las páginas 1,2,3,4 y 7; si su hijo no se orina en la cama deberá contestar las preguntas de las páginas 1,5,6 y 8.

Siendo la información obtenida completamente confidencial, los datos globales del estudio podrán ser difundidos a través de los medios científicos y profesionales, aunque sin otras referencias más que aquellas de carácter técnico necesarias para la definición de la metodología y materiales utilizados.

La encuesta debe ser entregada en el colegio antes de 1 semana.

**SÍ ALGUNO DE LOS TEMAS TRATADOS EN ESTA ENCUESTA SON DE SU PREOCUPACIÓN DEBERÍA COMENTÁRSELO AL PEDIATRA DE SU HIJO.**

## ESTA ES UNA ENCUESTA ANÓNIMA SOBRE LA SALUD DE SU HIJO

Respondida por madre ☐ <sup>(1)</sup> padre ☐ <sup>(2)</sup> otra persona ☐ <sup>(3)</sup>

Nº total de hijos \_\_\_\_\_ Nº que hace este hijo \_\_\_\_\_

Edad \_\_\_\_\_ años (fecha de nacimiento: \_\_ / \_\_ / \_\_)

Sexo Varón ☐ <sup>(1)</sup> Hembra ☐ <sup>(2)</sup>

Nacionalidad de los padres Española ☐ <sup>(1)</sup> Otra ☐ <sup>(2)</sup> ¿Cuál? \_\_\_\_\_

Padres separados Sí ☐ <sup>(1)</sup> No ☐ <sup>(2)</sup>

Situación laboral ambos trabajan ☐ <sup>(1)</sup> uno trabaja ☐ <sup>(2)</sup> ninguno trabaja ☐ <sup>(3)</sup>

Nacimiento de un hermano Sí ☐ <sup>(1)</sup> No ☐ <sup>(2)</sup>

Cambio de domicilio Sí ☐ <sup>(1)</sup> No ☐ <sup>(2)</sup>

Antecedentes de prematuridad Sí ☐ <sup>(1)</sup> No ☐ <sup>(2)</sup>

Tiene o ha tenido su hijo alguna enfermedad del sistema nervioso

No ☐ <sup>(1)</sup>

Sí ☐ <sup>(2)</sup> ¿Cuál? \_\_\_\_\_

Cambio de colegio Sí ☐ <sup>(1)</sup> No ☐ <sup>(2)</sup>

Está diagnosticado de hiperactividad y/o déficit de atención Sí ☐ <sup>(1)</sup> No ☐ <sup>(2)</sup>

Se mantuvo sentado Normal ☐ <sup>(1)</sup> Tarde ☐ <sup>(2)</sup> No recuerda ☐ <sup>(3)</sup>

Empezó a caminar Normal ☐ <sup>(1)</sup> Tarde ☐ <sup>(2)</sup> No recuerda ☐ <sup>(3)</sup>

Empezó a hablar Normal ☐ <sup>(1)</sup> Tarde ☐ <sup>(2)</sup> No recuerda ☐ <sup>(3)</sup>

Ha repetido algún curso en el colegio Sí ☐ <sup>(1)</sup> No ☐ <sup>(2)</sup>

Tiene sobrepeso (pesa más de lo normal para su edad) Sí ☐ <sup>(1)</sup> No ☐ <sup>(2)</sup>

Padece alguno de estos problemas Anginas grandes ☐ <sup>(1)</sup> Vegetaciones ☐ <sup>(2)</sup>

Tiene alguna alergia alimentaria No ☐ <sup>(1)</sup> Sí ☐ <sup>(2)</sup> a \_\_\_\_\_

ESTUDIOS DEL PADRE Ninguno ☐ <sup>(1)</sup> Primario ☐ <sup>(2)</sup> Bachiller ☐ <sup>(3)</sup> Universitario ☐ <sup>(4)</sup>

ESTUDIOS DE LA MADRE Ninguno ☐ <sup>(1)</sup> Primario ☐ <sup>(2)</sup> Bachiller ☐ <sup>(3)</sup> Universitario ☐ <sup>(4)</sup>

EN SU FAMILIA SE ORINA O HA ORINADO EN LA CAMA:

Nadie que sepa ☐ <sup>(1)</sup> Un padre ☐ <sup>(2)</sup> Ambos padres ☐ <sup>(3)</sup> Hermano ☐ <sup>(4)</sup> Otro familiar ☐ <sup>(5)</sup>

### CONTROL DE ESFÍNTERES EN ESCOLARES ASTURIANOS

¿SE ORINA SU HIJO/A durante el sueño?:

No ☐ <sup>(1)</sup> → Pase a la página 5 de este cuestionario

Sí ☐ <sup>(2)</sup> → Seguir con las preguntas que aparecen a continuación

**SU HIJO SE ORINA EN LA CAMA:**

Todos los días ☐<sup>(1)</sup> 2 o más veces/sem. ☐<sup>(2)</sup> 1 vez/semana ☐<sup>(3)</sup> 1 o más/mes ☐<sup>(4)</sup>  
En las primeras horas del sueño ☐<sup>(1)</sup> Indistintamente ☐<sup>(2)</sup> No sabe ☐<sup>(3)</sup>  
Alguna vez se orina más de una vez en la noche Sí ☐<sup>(1)</sup> No ☐<sup>(2)</sup>  
Empapa las sábanas ☐<sup>(1)</sup> Moja poco las sábanas ☐<sup>(2)</sup>

**¿ SU HIJO HA ESTADO PREVIAMENTE MÁS DE 6 MESES SIN ORINARSE?**

Sí ☐<sup>(1)</sup> No ☐<sup>(2)</sup>

**¿ SU HIJO HA ESTADO PREVIAMENTE MÁS DE 3 MESES SIN ORINARSE?**

Sí ☐<sup>(1)</sup> No ☐<sup>(2)</sup>

**LE PREOCUPA A USTED** mucho ☐<sup>(1)</sup> poco ☐<sup>(2)</sup> nada ☐<sup>(3)</sup>

**¿HA CONSULTADO ALGUNA VEZ A SU PEDIATRA POR ESTE ASUNTO?.**

No ☐<sup>(1)</sup>

Sí ☐<sup>(2)</sup> ¿Cuando por primera vez? a los \_\_\_\_\_ años  
¿Le ha dado algún consejo? Sí ☐<sup>(1)</sup> No ☐<sup>(2)</sup>  
¿Le ha propuesto algún tratamiento? Sí ☐<sup>(1)</sup> No ☐<sup>(2)</sup>  
¿Cuál? \_\_\_\_\_

**CONSIDERA QUE ORINARSE EN LA CAMA A LA EDAD DE SU HIJO ES:**

Algo normal y frecuente, que mejora y se cura con el tiempo ☐<sup>(1)</sup>  
Una enfermedad ☐<sup>(2)</sup>

**CREE QUE ES UN PROBLEMA**

Del riñón y las vías urinarias ☐<sup>(1)</sup>  
Psicológico ☐<sup>(2)</sup>  
Relacionado con la madurez y el desarrollo ☐<sup>(3)</sup>  
Producido por problemas del sueño ☐<sup>(4)</sup>

**¿CREE QUE SU HIJO HACE LO POSIBLE POR NO ORINARSE EN LA CAMA?**

Sí ☐<sup>(1)</sup> No ☐<sup>(2)</sup>

**¿LE INFORMARON ALGUNA VEZ EN SU CENTRO DE SALUD SOBRE EL CONTROL DE ORINA DE SU HIJO?**

No ☐<sup>(1)</sup>

Sí ☐<sup>(2)</sup> Cuando su hijo tenía \_\_\_\_\_ años

**¿HA INTENTADO LA ENSEÑANZA DEL CONTROL DE ESFÍNTERES?**

Sí ☐<sup>(1)</sup> No ☐<sup>(2)</sup>

**¿CÓMO SE SIENTE PORQUE SU HIJO SE ORINE EN LA CAMA?**

Frustrado ☐<sup>(1)</sup> Enfadado ☐<sup>(2)</sup> Avergonzado ☐<sup>(3)</sup> Nada de lo anterior ☐<sup>(4)</sup>

**¿REPRENDE O CASTIGA A SU HIJO CUANDO SE ORINA?**

Sí ☐<sup>(1)</sup> No ☐<sup>(2)</sup>

**¿PREMIA O HALAGA A SU HIJO CUANDO NO SE ORINA?**

Sí ☐<sup>(1)</sup>

No ☐<sup>(2)</sup>

**RESPECTO AL GASTO QUE ORIGINA QUE SU HIJO SE ORINE EN LA CAMA:**

Nada ☐<sup>(1)</sup>

Poco ☐<sup>(2)</sup>

Bastante ☐<sup>(3)</sup>

Mucho ☐<sup>(4)</sup>

**CREE QUE ORINARSE EN LA CAMA CONDICIONA LA VIDA DE SU HIJO**

Sí ☐<sup>(1)</sup>

No ☐<sup>(2)</sup>

**RESPECTO A LA VIDA SOCIAL DE SU HIJO, CREE QUE**

Le limita la relación con sus amigos

Sí ☐<sup>(1)</sup>

No ☐<sup>(2)</sup>

Le produce ansiedad

Sí ☐<sup>(1)</sup>

No ☐<sup>(2)</sup>

Le produce sentimiento de culpa

Sí ☐<sup>(1)</sup>

No ☐<sup>(2)</sup>

Se siente rechazado por sus compañeros

Sí ☐<sup>(1)</sup>

No ☐<sup>(2)</sup>

**¿SE LEVANTA ALGUNA VEZ SU HIJO DE NOCHE PARA ORINAR?**

No ☐<sup>(1)</sup>

Sí ☐<sup>(1)</sup> Con frecuencia ☐<sup>(2)</sup> Pocas veces ☐<sup>(3)</sup> Excepcionalmente ☐<sup>(4)</sup>

**¿SE HA ORINADO SU HIJO INVOLUNTARIAMENTE DE DÍA EN LOS ÚLTIMOS 6 MESES?** (Considere que sí cuando haya mojado al menos su ropa interior).

No ☐<sup>(1)</sup>

Sí ☐<sup>(1)</sup> 1 vez al mes ☐<sup>(2)</sup> 1-3 veces al mes ☐<sup>(3)</sup> más de 3 veces ☐<sup>(4)</sup>

**¿CUÁNTAS VECES ORINA AL DÍA SU HIJO?**

1 a 3 veces ☐<sup>(1)</sup>

3 a 7 veces ☐<sup>(2)</sup>

más de 7 veces ☐<sup>(3)</sup>

**¿CONSIDERA QUE SU HIJO ES ESTREÑIDO?**

Sí ☐<sup>(1)</sup>

No ☐<sup>(2)</sup>

**EN NÚMERO DE DEPOSICIONES DE SU HIJO ES**

Regular ☐<sup>(1)</sup>

Irregular ☐<sup>(2)</sup>

**EN NÚMERO DE DEPOSICIONES DE SU HIJO ES**

A diario ☐<sup>(1)</sup> 4 a 6 por semana ☐<sup>(2)</sup> 1 a 3 por semana ☐<sup>(3)</sup> Menos 1 por semana ☐<sup>(4)</sup>

**¿HA PADECIDO SU HIJO ALGUNA INFECCIÓN DE ORINA?**

No ☐<sup>(1)</sup>

Sí ☐<sup>(2)</sup>

¿Cuántas? \_\_\_\_\_

¿A qué edad sufrió la primera? A los \_\_\_\_\_ años

**¿A QUÉ EDAD SU HIJO HIZO POR PRIMERA VEZ PIS EN EL BAÑO O EN EL ORINAL?**

Aproximadamente a los \_\_\_\_\_ años y \_\_\_\_\_ meses

**¿A QUÉ EDAD SU HIJO HIZO SUS DEPOSICIONES POR PRIMERA VEZ EN EL BAÑO O EN EL ORINAL?**

Aproximadamente a los \_\_\_\_\_ años y \_\_\_\_\_ meses

**¿A QUÉ EDAD LE RETIRÓ EL PAÑAL DE DÍA?**

Aproximadamente a los \_\_\_\_\_ años y \_\_\_\_\_ meses

**¿A QUÉ EDAD LE RETIRÓ EL PAÑAL DE NOCHE?**

Aproximadamente a los \_\_\_\_\_ años y \_\_\_\_\_ meses

Todavía sigue usándolo ☐<sup>(1)</sup>

**¿SE LE ESCAPAN LAS HECES O MANCHA LA ROPA INTERIOR? .**

Nunca ☐<sup>(1)</sup> Ocasionalmente ☐<sup>(2)</sup> Frecuentemente ☐<sup>(3)</sup> Diariamente ☐<sup>(4)</sup>

**¿CREE QUE SU HIJO TIENE UN SUEÑO ANORMALMENTE PROFUNDO?**

Sí ☐<sup>(1)</sup>

No ☐<sup>(2)</sup>

**¿RONCA DE NOCHE?**

Sí ☐<sup>(1)</sup>

No ☐<sup>(2)</sup>

**¿LE PARECE QUE A VECES DEJA DE RESPIRAR MIENTRAS DUERME?**

Sí ☐<sup>(1)</sup>

No ☐<sup>(2)</sup>

**¿SE DESPIERTA CANSADO POR LA MAÑANA?**

Sí ☐<sup>(1)</sup>

No ☐<sup>(2)</sup>

**¿SE QUEJA HABITUALMENTE DE SUEÑO DURANTE EL DÍA?**

Sí ☐<sup>(1)</sup>

No ☐<sup>(2)</sup>

**¿TIENE MIEDO A LA OSCURIDAD?**

Sí ☐<sup>(1)</sup>

No ☐<sup>(2)</sup>

**¿TIENE PESADILLAS O TERRORES NOCTURNOS?**

Sí ☐<sup>(1)</sup>

No ☐<sup>(2)</sup>

**¿HABLA DURANTE EL SUEÑO?**

Sí ☐<sup>(1)</sup>

No ☐<sup>(2)</sup>

**¿CREE QUE SU HIJO SE RELACIONA BIEN CON NIÑOS DE SU MISMA EDAD?**

Sí ☐<sup>(1)</sup>

No ☐<sup>(2)</sup>

**USTED CONSIDERA QUE EL MODELO DE EDUCACIÓN FAMILIAR ES:**

Democrático ☐<sup>(1)</sup> Autoritario ☐<sup>(2)</sup> Permisivo ☐<sup>(3)</sup> Mezcla de los anteriores ☐<sup>(4)</sup>

SI SU HIJO SE ORINA EN LA CAMA, PASE A LA PÁGINA 7 Y  
REALÍCELE LAS PREGUNTAS QUE APARECEN EN LA MISMA

## CONTESTAR SÓLO SÍ SU NIÑO NO SE ORINA EN LA CAMA

**¿LE INFORMARON ALGUNA VEZ EN SU CENTRO DE SALUD SOBRE EL CONTROL DE ORINA DE SU HIJO?**

No ☐<sup>(1)</sup>

Sí ☐<sup>(2)</sup>

Cuando su hijo tenía \_\_\_\_\_ años

**¿HA INTENTADO LA ENSEÑANZA DEL CONTROL DE ESFÍNTERES?**

Sí ☐<sup>(1)</sup>

No ☐<sup>(2)</sup>

**¿A QUÉ EDAD HA LOGRADO SU HIJO ESTAR SECO DE NOCHE MÁS DE 6 MESES?**

Aproximadamente a los \_\_\_\_\_ años y \_\_\_\_\_ meses

**¿A QUÉ EDAD SU HIJO HIZO POR PRIMERA VEZ PIS EN EL BAÑO O EN EL ORINAL?**

Aproximadamente a los \_\_\_\_\_ años y \_\_\_\_\_ meses

**¿A QUÉ EDAD SU HIJO HIZO SUS DEPOSICIONES POR PRIMERA VEZ EN EL BAÑO O EN EL ORINAL?**

Aproximadamente a los \_\_\_\_\_ años y \_\_\_\_\_ meses

**¿A QUÉ EDAD LE RETIRÓ EL PAÑAL DE DÍA?**

Aproximadamente a los \_\_\_\_\_ años y \_\_\_\_\_ meses

**¿A QUÉ EDAD LE RETIRÓ EL PAÑAL DE NOCHE?**

Aproximadamente a los \_\_\_\_\_ años y \_\_\_\_\_ meses

**¿SE LEVANTA ALGUNA VEZ SU HIJO DE NOCHE PARA ORINAR?**

No ☐<sup>(1)</sup>

Sí ☐ Con frecuencia ☐<sup>(2)</sup> Pocas veces ☐<sup>(3)</sup> Excepcionalmente ☐<sup>(4)</sup>

**¿SE HA ORINADO SU HIJO INVOLUNTARIAMENTE DE DÍA EN LOS ÚLTIMOS 6 MESES?** (Considere que sí cuando haya mojado su ropa interior).

No ☐<sup>(1)</sup>

Sí ☐ 1 vez al mes ☐<sup>(2)</sup> 1-3 veces al mes ☐<sup>(3)</sup> más de 3 veces ☐<sup>(4)</sup>

**¿CUÁNTAS VECES ORINA AL DÍA SU HIJO?**

1 a 3 veces ☐<sup>(1)</sup>

3 a 7 veces ☐<sup>(2)</sup>

más de 7 veces ☐<sup>(3)</sup>

**¿CONSIDERA QUE SU HIJO ES ESTREÑIDO?**

Sí ☐<sup>(1)</sup>

No ☐<sup>(2)</sup>

**EL NÚMERO DE DEPOSICIONES DE SU HIJO ES**

Regular ☐<sup>(1)</sup>

Irregular ☐<sup>(2)</sup>

**EL NÚMERO DE DEPOSICIONES DE SU HIJO ES**

A diario ☐<sup>(1)</sup> 4 a 6 por semana ☐<sup>(2)</sup> 1 a 3 por semana ☐<sup>(3)</sup> Menos 1 por semana ☐<sup>(4)</sup>

**¿SE LE ESCAPAN LAS HECES O MANCHA LA ROPA INTERIOR? .**

Nunca ☐<sup>(1)</sup> Ocasionalmente ☐<sup>(2)</sup> Frecuentemente ☐<sup>(3)</sup> Diariamente ☐<sup>(4)</sup>

**¿CREE QUE SU HIJO TIENE UN SUEÑO ANORMALMENTE PROFUNDO?**

Sí ☐<sup>(1)</sup> No ☐<sup>(2)</sup>

**¿RONCA DE NOCHE?**

Sí ☐<sup>(1)</sup> No ☐<sup>(2)</sup>

**¿LE PARECE QUE A VECES DEJA DE RESPIRAR MIENTRAS DUERME?**

Sí ☐<sup>(1)</sup> No ☐<sup>(2)</sup>

**¿SE DESPIERTA CANSADO POR LA MAÑANA?**

Sí ☐<sup>(1)</sup> No ☐<sup>(2)</sup>

**¿SE QUEJA HABITUALMENTE DE SUEÑO DURANTE EL DÍA?**

Sí ☐<sup>(1)</sup> No ☐<sup>(2)</sup>

**¿TIENE MIEDO A LA OSCURIDAD?**

Sí ☐<sup>(1)</sup> No ☐<sup>(2)</sup>

**¿TIENE PESADILLAS O TERRORES NOCTURNOS?**

Sí ☐<sup>(1)</sup> No ☐<sup>(2)</sup>

**¿HABLA DURANTE EL SUEÑO?**

Sí ☐<sup>(1)</sup> No ☐<sup>(2)</sup>

**¿HA PADECIDO SU HIJO ALGUNA INFECCIÓN DE ORINA?**

No ☐<sup>(1)</sup>

Sí ☐<sup>(2)</sup>

¿Cuántas? \_\_\_\_\_

¿A qué edad sufrió la primera? A los \_\_\_\_\_ años

**¿CREE QUE SU HIJO SE RELACIONA BIEN CON NIÑOS DE SU MISMA EDAD?**

Sí ☐<sup>(1)</sup> No ☐<sup>(2)</sup>

**USTED CONSIDERA QUE EL MODELO DE EDUCACIÓN FAMILIAR ES**

Democrático ☐<sup>(1)</sup> Autoritario ☐<sup>(2)</sup> Permisivo ☐<sup>(3)</sup> Mezcla de los anteriores ☐<sup>(4)</sup>

SI SU HIJO NO SE ORINA EN LA CAMA, PASE A LA PÁGINA 8 Y  
REALÍCELE LAS PREGUNTAS QUE APARECEN EN LA MISMA

## PREGUNTAS A REALIZAR A SU HIJO (SI SE ORINA EN LA CAMA)

### ¿CUÁNTAS VECES ORINAS AL DÍA?

1 a 3 veces ☐<sup>(1)</sup>

3 a 7 veces ☐<sup>(2)</sup>

más de 7 veces ☐<sup>(3)</sup>

### ¿CUÁNTAS VECES ORINAS EN HORARIO DE COLEGIO?

Ninguna ☐<sup>(1)</sup>

1 ó 2 ☐<sup>(2)</sup>

Tres o más ☐<sup>(3)</sup>

### ¿SALES HABITUALMENTE DE CLASE AL BAÑO A ORINAR?

Sí ☐<sup>(1)</sup>

No ☐<sup>(2)</sup>

### ¿TIENES ALGUNA VEZ INTENSO DESEO DE ORINAR Y MIEDO A QUE SE TE ESCAPE?

Sí ☐<sup>(1)</sup>

No ☐<sup>(2)</sup>

### ¿SE TE ESCAPA LA ORINA EN ALGUNA OCASIÓN? (Contestar que sí si se moja la ropa interior)

No ☐<sup>(1)</sup>

Sí ☐<sup>(2)</sup>

Al hacer algún esfuerzo ☐

Al reír ☐

Al toser ☐

Sin darme cuenta ☐

### CREES QUE ORINARSE EN LA CAMA A TU EDAD ES:

Frecuente y normal ☐<sup>(1)</sup>

Molesto ☐<sup>(2)</sup>

Una enfermedad ☐<sup>(3)</sup>

### CUANDO TE ORINAS EN LA CAMA, TE SIENTES:

Enfadado ☐<sup>(1)</sup>

Avergonzado ☐<sup>(2)</sup>

Indiferente ☐<sup>(3)</sup>

### ¿CREES QUE ORINARTE EN LA CAMA TE LIMITA LA RELACIÓN CON TUS AMIGOS Y COMPAÑEROS?

Sí ☐<sup>(1)</sup>

No ☐<sup>(2)</sup>

### CUANDO TE ORINAS EN LA CAMA CREES QUE TUS PADRES LE DAN:

Mucha importancia ☐<sup>(1)</sup>

Poca ☐<sup>(2)</sup>

Ninguna ☐<sup>(3)</sup>



## PREGUNTAS A REALIZAR A SU HIJO (SI NO ORINA EN LA CAMA)

**¿CUÁNTAS VECES ORINAS AL DÍA?**

1 a 3 veces ☐<sup>(1)</sup>

3 a 7 veces ☐<sup>(2)</sup>

más de 7 veces ☐<sup>(3)</sup>

**¿CUÁNTAS VECES ORINAS EN HORARIO DE COLEGIO?**

Ninguna ☐<sup>(1)</sup>

1 ó 2 ☐<sup>(2)</sup>

Tres o más ☐<sup>(3)</sup>

**¿SALES HABITUALMENTE DE CLASE AL BAÑO A ORINAR?**

Sí ☐<sup>(1)</sup>

No ☐<sup>(2)</sup>

**¿TIENES ALGUNA VEZ INTENSO DESEO DE ORINAR Y MIEDO A QUE SE TE ESCAPE?**

Sí ☐<sup>(1)</sup>

No ☐<sup>(2)</sup>

**¿SE TE ESCAPA LA ORINA EN ALGUNA OCASIÓN?** (Contestar que sí si se moja la ropa interior)

No ☐<sup>(1)</sup>

Sí ☐<sup>(2)</sup>

Al hacer algún esfuerzo ☐

Al reír ☐

Al toser ☐

Sin darme cuenta ☐

**TE PARECE QUE ORINARSE EN LA CAMA A TU EDAD ES NORMAL:**

Sí ☐<sup>(1)</sup>

No ☐<sup>(2)</sup>

**USTED VIVE EN UNA POBLACIÓN:**

- de menos de 2000 habitantes ☐
- de 2000 a 10.000 habitantes ☐
- de más de 10.000 habitantes ☐

**SI POR ALGÚN TEMA RELACIONADO CON ESTE TRABAJO  
QUIERE CONTACTAR CON NOSOTROS:**

Díganos el nº de teléfono al que le podemos llamar:

---

**Indíquenos la causa de su preocupación:**

Alguna pregunta sobre la enuresis nocturna ☐

Su hijo se orina de día, siente urgencia o dificultad al orinar ☐

Si es otra preocupación, díganos cuál:

---
